# Adaptive Cluster Synchronization of Directed Complex Networks with Time Delays

Heng Liu\*, Xingyuan Wang, Guozhen Tan

Faculty of Electronic Information and Electrical Engineering, Dalian University of Technology, Dalian, China

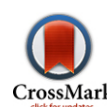

## Abstract

This paper studied the cluster synchronization of directed complex networks with time delays. It is different from undirected networks, the coupling configuration matrix of directed networks cannot be assumed as symmetric or irreducible. In order to achieve cluster synchronization, this paper uses an adaptive controller on each node and an adaptive feedback strategy on the nodes which in-degree is zero. Numerical example is provided to show the effectiveness of main theory. This method is also effective when the number of clusters is unknown. Thus, it can be used in the community recognizing of directed complex networks.

**Citation:** Liu H, Wang X, Tan G (2014) Adaptive Cluster Synchronization of Directed Complex Networks with Time Delays. PLoS ONE 9(4): e95505. doi:10.1371/journal.pone.0095505

**Editor:** Daniele Marinazzo, Universiteit Gent, Belgium

**Received:** January 29, 2014; **Accepted:** March 27, 2014; **Published:** April 24, 2014

**Copyright:** © 2014 Liu et al. This is an open-access article distributed under the terms of the Creative Commons Attribution License, which permits unrestricted use, distribution, and reproduction in any medium, provided the original author and source are credited.

**Funding:** This research is supported by the National Natural Science Foundation of China (Nos: 61370145, 61173183, and 60973152), the Doctoral Program Foundation of Institution of Higher Education of China (No: 20070141014), Program for Liaoning Excellent Talents in University (No: LR2012003), the National Natural Science Foundation of Liaoning province (No: 20082165) and the Fundamental Research Funds for the Central Universities (No: DUT12JB06). The funders had no role in study design, data collection and analysis, decision to publish, or preparation of the manuscript.

**Competing Interests:** The authors have declared that no competing interests exist.

\* E-mail: liuheng@mail.dlut.edu.cn

## Introduction

During last decade, the study of complex networks has become a hot topic in various fields like physics, mathematics, biology, social sciences, computer sciences, and so on [1–3]. Most of complex networks have two properties: small-world and scale-free [4–5]. Recently, as one of the most important phenomenon of dynamical system, synchronization has gained growing attention. So far, many different kinds of synchronization in complete networks are realized, such as generalized synchronization, phase synchronization, cluster synchronization and so on [6–25]. Nowadays, cluster synchronization has been widely and thoroughly studied because it can show the community of the complex networks [26–30].

Cluster synchronization is a middle state of the progress which is from none-synchronization to complete synchronization. When this middle state is achieved, the nodes in same group (or community, or cluster) can achieve complete synchronization, but the nodes in different clusters are chaotic. Owing to the significant application in biological science and communication engineering, the researching of cluster synchronization is focus on the control method such as pinning control, adaptive control, impulsive control, and so on, but few of them studies cluster synchronization of directed complex networks with time delays.

Liu and others researched generalized synchronization of three typical complex dynamical networks including scale-free network, small-world network, and a family of interpolating network [7]. They found that there is a general progress to global generalized synchronization (GS): non-GS  $\rightarrow$  partial GS  $\rightarrow$  global GS and the GS starts from a small part of hub nodes with larger degrees first. In their paper, the partial GS is called cluster synchronization. Several interesting adaptive and impulsive synchronization criteria are attained for a general complex dynamical network with two

different clusters by Shi and others in [8]. Lu proposed a novel adaptive strategy to make a network achieve cluster synchronization in [9], and Liu and others investigated the cluster synchronization with intermittent control in [10]. They also pointed out that to realize cluster synchronization, enlarging the couplings of nodes in the same cluster is the key point.

There are also some papers on cluster synchronization of directed networks without time delays. Ma and others intensively studied the pinning cluster synchronization of directed complex networks in [11]. They gave the pinning controllers which are applied to inter-act nodes and intra-act nodes with zero in-degree, respectively.

This paper uses an adaptive controller to make a directed network with time delays achieved cluster synchronization. The rest part of the paper is shown as following. In Section 2, the model of directed complex dynamical network and some preliminaries are given. The main theorems and corollaries for cluster synchronization through adaptive control are given in Section 3. At last, a numerical simulation is provided to show the effectiveness of the theoretical results. Conclusions are finally drawn in Section 5.

## Preliminaries

Consider a directed complex network with  $N$  identical coupled nodes:

$$\dot{x}_i(t) = f_i(x_i(t), x_i(t - \tau_1)) + \sum_{j=1}^N a_{ij} x_j(t - \tau_2); \quad i = 1, 2, \dots, N \quad (1)$$

Here  $x_i = [x_{i1}, x_{i2}, \dots, x_{iN}]^T \in \mathbb{R}^N$  is the state vector of node  $i$ ; function  $f: \mathbb{R}^N \rightarrow \mathbb{R}^N$  is a nonlinear function which can describe

each node's dynamics;  $\tau_1$  and  $\tau_2$  are time-varying delay and coupling delay, respectively. Matrix  $A = (a_{ij})^{N \times N}$  represents the topological structure of the network. In a directed complex network,  $a_{ij}$  is defined as follows: if there is a direct link from node  $i$  to node  $j$  ( $i \neq j$ ), then  $a_{ij} = -a_{ji} = 1$ ; otherwise  $a_{ij} = a_{ji} = 0$ . Matrix  $A$  is satisfied with diffusive condition as follows:

$$a_{ii} = - \sum_{j=1, j \neq i}^N a_{ij}, \quad i = 1, 2, \dots, N$$

Because the complex network is directed, this paper doesn't assume  $A$  as symmetric or irreducible like other papers. The in-degree of node  $i$  is defined as:

$$-a_{ii} = \sum_{j=1}^N a_{ij}$$

If the  $i$ th node is satisfied with the following equation

$$\sum_{j=1}^N a_{ij} = -a_{ii} = 0,$$

this paper will call the node which is under this condition as 0-in-degree node.

Assume that the network has  $P$  clusters ( $P$  is unknown), which means that all nodes in network will split into  $P$  groups when the network achieves cluster synchronization. If  $P = 1$ , then cluster synchronization turns to complete synchronization. If node  $i$  belongs to the  $k$ th cluster, this paper denotes that  $\omega_i = k$ . When the complex network achieves cluster synchronization, for any node  $i, j$ , the following equation is established.

$$\begin{cases} \lim_{t \rightarrow 0} \|x_i(t) - x_j(t)\| = 0, & \omega_i = \omega_j \\ \lim_{t \rightarrow 0} \|x_i(t) - x_j(t)\| \neq 0, & \omega_i \neq \omega_j \end{cases}$$

That is to say, when the network achieves cluster synchronization, the community of the network can be recognized. If it defines a solution vector  $S = (s_1(t), s_2(t), \dots, s_M(t))^T$  to represent the desired state when the network achieves cluster synchronization at time  $t$ , here  $k = 1, 2, \dots, M$ . The error system is defined as follows:

$$e_i(t) = x_i(t) - s_{\omega_i}(t)$$

Here the stable dynamic status  $s_{\omega_i}$  is satisfied with  $\dot{s}_{\omega_i}(t) = f(s_{\omega_i}(t), s_{\omega_i}(t - \tau_1))$ . The complex network can be considered to achieve  $P$ -cluster synchronization when the following condition is satisfied:

$$\begin{cases} \lim_{t \rightarrow 0} \|e_i(t)\| = 0, & \omega_i = \omega_j \\ \lim_{t \rightarrow 0} \|e_i(t)\| \neq 0, & \omega_i \neq \omega_j \end{cases} \quad (2)$$

## Adaptive Cluster Synchronization

In order to make complex network Eq. (1) achieved cluster synchronization, an adaptive controller  $u_i(t)$  is added on each node. The controlled dynamic network can be rewritten as

$$\begin{aligned} \dot{x}_i(t) &= f_i(x_i(t), x_i(t - \tau_1)) + \\ &\sum_{j=1}^N a_{ij} x_j(t - \tau_2) + u_i(t); \quad i = 1, 2, \dots, N \end{aligned} \quad (3)$$

The controller is designed as following:

$$u_i(t) = - \sum_{j=1}^N a_{ij} s_{\omega_j}(t - \tau_2) - k e_i \quad (4)$$

Here, the constant  $k > 0$ . The error system of Eq. (2) can be obtained as

$$\begin{aligned} \dot{e}_i &= \dot{x}_i - \dot{s}_{\omega_i} = f_i(x_i(t), x_i(t - \tau_1)) - \\ &f_i(s_{\omega_i}(t), s_{\omega_i}(t - \tau_1)) + \sum_{j=1}^N a_{ij} x_j(t - \tau_2) + u_i \end{aligned} \quad (5)$$

Throughout this paper, the following assumptions are needed to prove the main theorem.

**Assumption 1.** If there is a nonlinear dynamical function  $f$ , to any state vectors  $x, y \in \mathbb{R}^{N \times 1}$ , there exists a constant  $M > 0$  to make the following equation established:

$$\begin{aligned} &\|f(x(t), x(t - \tau)) - f(y(t), y(t - \tau))\| \leq M \\ &(\|x(t) - y(t)\| + \|x(t - \tau) - y(t - \tau)\|) \end{aligned} \quad (6)$$

**Remark 1.** Assumption 1 holds as long as  $\frac{\partial f}{\partial x}$  are uniformly bounded. Almost all well-known dynamical chaotic and hyper chaotic systems have the form of Eq. (3), which meets the condition of assumption 1 [31].

**Assumption 2.** There exists a constant  $\mu$  which can make a differentiable time-varying delay  $\tau(t)$  satisfied the following equation.

$$0 \leq \dot{\tau}(t) \leq \mu < 1$$

It is clearly that assumption 2 is valid for constant  $\tau(t)$ .

1. When the network has no 0-in-degree node.

**Theorem 1.** Under assumption 1 and 2, the controlled complex network Eq. (3) with adaptive controller Eq. (4) can achieve cluster synchronization if  $k$  is satisfied with the following equation

$$\frac{M+1}{2} + \frac{M+1}{2(1-\mu)} - k + \lambda_{\max}(\bar{A}) < 0 \quad (7)$$

Here,  $M$  and  $\mu$  are positive constants, and

$$\bar{A} = \frac{A + A^T}{2}$$

**Proof.** Define a Lyapunov function:

$$2V(t) = \sum_{i=1}^N e_i^T(t)e_i(t) + \int_{t-\tau_1}^t \frac{M}{1-\mu} \sum_{i=1}^N e_i^T(z)e_i(z)dz + \int_{t-\tau_2}^t \frac{1}{1-\mu} \sum_{i=1}^N e_i^T(z)e_i(z)dz \quad (8)$$

Calculating the time derivative of  $V(t)$  along the trajectories of Eq. (4), one has

$$\begin{aligned} \dot{V}(t) &= \sum_{i=1}^N e_i^T \dot{e}_i + \frac{M+1}{2(1-\mu)} \sum_{i=1}^N e_i^T e_i + \frac{-M(1-\dot{\tau}_1)}{2(1-\mu)} \sum_{i=1}^N e_i^T(t-\tau_1)e_i(t-\tau_1) + \frac{-(1-\dot{\tau}_2)}{2(1-\mu)} \sum_{i=1}^N e_i^T(t-\tau_2)e_i(t-\tau_2) \\ &= \sum_{i=1}^N e_i^T [f_i(x_i(t), x_i(t-\tau_1)) - f_i(s_{\omega_i}(t), s_{\omega_i}(t-\tau_1))] + \sum_{j=1}^N a_{ij}x_j(t-\tau_2) - \sum_{j=1}^N a_{ij}s_{\omega_j}(t-\tau_2) - ke_i \\ &\quad + \frac{M+1}{2(1-\mu)} \sum_{i=1}^N e_i^T e_i + \frac{-M(1-\dot{\tau}_1)}{2(1-\mu)} \sum_{i=1}^N e_i^T(t-\tau_1)e_i(t-\tau_1) + \frac{-(1-\dot{\tau}_2)}{2(1-\mu)} \sum_{i=1}^N e_i^T(t-\tau_2)e_i(t-\tau_2) \\ &\leq \sum_{i=1}^N \left[ \frac{M+1}{2} e_i^T e_i + \frac{M}{2} e_i^T(t-\tau_1)e_i(t-\tau_1) \right] + \sum_{i=1}^N e_i^T \left[ \sum_{j=1}^N a_{ij}x_j(t-\tau_2) - \sum_{j=1}^N a_{ij}s_{\omega_j}(t-\tau_2) - ke_i \right] \\ &\quad + \frac{M+1}{2(1-\mu)} \sum_{i=1}^N e_i^T e_i + \frac{-M(1-\dot{\tau}_1)}{2(1-\mu)} \sum_{i=1}^N e_i^T(t-\tau_1)e_i(t-\tau_1) + \frac{-(1-\dot{\tau}_2)}{2(1-\mu)} \sum_{i=1}^N e_i^T(t-\tau_2)e_i(t-\tau_2) \\ &= \left( \frac{M+1}{2} + \frac{M+1}{2(1-\mu)} - k \right) \sum_{i=1}^N e_i^T e_i + \sum_{i=1}^N \sum_{j=1}^N e_i^T a_{ij}e_j(t-\tau_2) \\ &\quad + \frac{M(\dot{\tau}_1-\mu)}{2(1-\mu)} \sum_{i=1}^N e_i^T(t-\tau_1)e_i(t-\tau_1) + \frac{-(1-\dot{\tau}_2)}{2(1-\mu)} \sum_{i=1}^N e_i^T(t-\tau_2)e_i(t-\tau_2) \end{aligned}$$

If the equation  $E = (e_1^T, e_2^T, \dots, e_N^T)^T \in R^{N \times 1}$  is denoted, one gets

$$\begin{aligned} \dot{V} &\leq \left( \frac{M+1}{2} + \frac{M+1}{2(1-\mu)} - k \right) E^T E + E^T A E(t-\tau_2) + \\ &\quad \frac{1}{2} E^T A A^T E + \\ &\quad \frac{-(1-\dot{\tau}_2)}{2(1-\mu)} E^T(t-\tau_2) E(t-\tau_2) \end{aligned}$$

According assumption 1, one gets

$$E^T A E(t-\tau_2) \leq \frac{1}{2} E^T A A^T E + \frac{1}{2} E^T(t-\tau_2) E(t-\tau_2)$$

Thus, under assumption 2 and Eq. (7), the following equation can be established.

$$\begin{aligned} \dot{V} &\leq \left( \frac{M+1}{2} + \frac{M+1}{2(1-\mu)} - k \right) E^T E + \frac{1}{2} E^T A A^T E \\ &\quad + \frac{M(\dot{\tau}_1-\mu)}{2(1-\mu)} E^T(t-\tau_1) E(t-\tau_1) + \frac{\dot{\tau}_2-\mu}{2(1-\mu)} E^T(t-\tau_2) E(t-\tau_2) \\ &\leq \left( \frac{M+1}{2} + \frac{M+1}{2(1-\mu)} - k + \lambda_{\max}(\bar{A}) \right) E^T E \\ &< 0 \end{aligned}$$

Thus Eq. (2) can be satisfied by the condition as Eq. (7), the proof is completed.

2. When the network has some 0-in-degree nodes.

0-in-degree nodes just send information into network but do not receive information from other nodes. That is to say, 0-in-degree nodes are hard to achieve synchronization. This can be proved as following. The linearization of Eq. (5) with controller Eq. (4) can be rewritten as

$$\dot{e} = (Df_i(x_i) - \sum_{j=1}^N a_{ij})e_i \quad (9)$$

Here,  $Df_i(x_i)$  is the Jacobi matrix of function  $f(x_i)$  at  $x_i$ . If the  $i$ th node is 0-in-degree node, one has

$$\sum_{j=1}^N a_{ij}(i \neq j).$$

So 0-in-degree node has

$$\dot{e}_i = (Df_i(x_i))e_i.$$

Since  $Df_i(x_i) \neq 0$ ,  $e_i \neq 0$ , the error system of 0-in-degree node is hardly to equal 0. It means that the network is hardly to achieve synchronization.

In order to make the network which has 0-in-degree nodes achieved cluster synchronization, this paper designs a feedback adaptive strategy on 0-in-degree nodes.

**Theorem 2.** Under assumption 1 and 2, if complex network Eq. (3) has 0-in-degree nodes, it can achieve the desired cluster synchronization if controller Eq. (4) and adaptive condition Eq. (7) hold, and adaptive feedback strategy is given as Eq. (10), and Eq. (11) is established.

$$\dot{k} = m \sum_{i=1}^N e_i^T e_i \quad (10)$$

$$\frac{M+1}{2} + \frac{M+1}{2(1-\mu)} - k_0 + \lambda_{\max}(\bar{A}) < 0 \quad (11)$$

where  $m$  is a positive constant,  $k_0 > 0$  is a known constant.

**Proof.** Define a Lyapunov function as

$$\begin{aligned} 2V(t) = & \sum_{i=1}^N e_i^T(t) e_i(t) + \frac{1}{m} (k - k_0)^2 \\ & + \int_{t-\tau_1}^t \frac{M}{1-\mu} \sum_{i=1}^N e_i^T(z) e_i(z) dz \\ & + \int_{t-\tau_2}^t \frac{1}{1-\mu} \sum_{i=1}^N e_i^T(z) e_i(z) dz \end{aligned}$$

Calculating the time derivative of  $V(t)$  along the trajectories of Eq. (4), one has

$$\begin{aligned} \dot{V}(t) = & \sum_{i=1}^N e_i^T \dot{e}_i + \frac{1}{m} (k - k_0) \dot{k} + \frac{M+1}{2(1-\mu)} \sum_{i=1}^N e_i^T e_i \\ & + \frac{-M(1-\dot{\tau}_1)}{2(1-\mu)} \sum_{i=1}^N e_i^T(t-\tau_1) e_i(t-\tau_1) + \frac{-(1-\dot{\tau}_2)}{2(1-\mu)} \sum_{i=1}^N e_i^T(t-\tau_2) e_i(t-\tau_2) \\ = & \sum_{i=1}^N e_i^T [F(x_i, t) - F(s_{\omega_i}, t) + \sum_{j=1}^N a_{ij} x_j(t-\tau_2) - \sum_{j=1}^N a_{ij} s_{\omega_j}(t-\tau_2) - k e_i] + (k - k_0) \sum_{i=1}^N e_i^T e_i \\ & + \frac{M+1}{2(1-\mu)} \sum_{i=1}^N e_i^T e_i + \frac{-M(1-\dot{\tau}_1)}{2(1-\mu)} \sum_{i=1}^N e_i^T(t-\tau_1) e_i(t-\tau_1) + \frac{-(1-\dot{\tau}_2)}{2(1-\mu)} \sum_{i=1}^N e_i^T(t-\tau_2) e_i(t-\tau_2) \\ \leq & \sum_{i=1}^N \left[ \frac{M+1}{2} e_i^T e_i + \frac{M}{2} e_i^T(t-\tau_1) e_i(t-\tau_1) \right] + \sum_{i=1}^N e_i^T \left[ \sum_{j=1}^N a_{ij} x_j(t-\tau_2) - \sum_{j=1}^N a_{ij} s_{\omega_j}(t-\tau_2) - k_0 e_i \right] \\ & + \frac{M+1}{2(1-\mu)} \sum_{i=1}^N e_i^T e_i + \frac{-M(1-\dot{\tau}_1)}{2(1-\mu)} \sum_{i=1}^N e_i^T(t-\tau_1) e_i(t-\tau_1) + \frac{-(1-\dot{\tau}_2)}{2(1-\mu)} \sum_{i=1}^N e_i^T(t-\tau_2) e_i(t-\tau_2) \\ = & \left( \frac{M+1}{2} + \frac{M+1}{2(1-\mu)} - k_0 \right) \sum_{i=1}^N e_i^T e_i + \sum_{i=1}^N \sum_{j=1}^N e_i^T a_{ij} e_j(t-\tau_2) \\ & + \frac{M(\dot{\tau}_1 - \mu)}{2(1-\mu)} \sum_{i=1}^N e_i^T(t-\tau_1) e_i(t-\tau_1) + \frac{-(1-\dot{\tau}_2)}{2(1-\mu)} \sum_{i=1}^N e_i^T(t-\tau_2) e_i(t-\tau_2) \end{aligned}$$

According the proof of theorem 1, under assumption 1 and 2, one gets  $\dot{V} < 0$  if the following equation is established.

$$\frac{M+1}{2} + \frac{M+1}{2(1-\mu)} - k_0 + \lambda_{\max}(\bar{A}) < 0$$

The proof is complete.

## Simulation

This section will give some examples to verify the effectiveness of the proposed theorems in section 3. In the following numerical simulations, 3-dimensional Lorenz system is designed as the dynamical of each node. Lorenz function can be described as following:

$$f(x_i) = \begin{cases} \alpha(x_{i2} - x_{i1}) \\ \beta x_{i1} - x_{i2} - x_{i1} x_{i3} \\ x_{i1} x_{i2} - \gamma x_{i3} \end{cases} \quad (12)$$

When the parameters are chosen as  $\alpha=10$ ,  $\beta=28$ ,  $\gamma=8/3$ , Lorenz system is chaotic. Under these parameters, the nodes' dynamics can be described as

$$\dot{x}_i = f_i(x_i) = [10(x_{i2} - x_{i1}), 28x_{i1} - x_{i2} - x_{i1}x_{i3}, x_{i1}x_{i2} - 8/3x_{i3}]^T \quad (13)$$

## Example 1

In this simulation, a directed BA scale-free network is constructed. The detail generation algorithm for BA scale-free network is introduced in [5]. The parameter are  $m=m_0=5$ ,

$N=100$ . Because the network is directed, when the  $i$ th node and the  $j$ th node are connected from node  $i$  to node  $j$ , then  $a_{ij} = -a_{ji} = 1$ . Each node of the network is controlled as Eq. (4), and the in-degree of each node is not 0, which means the following equation will be established for each node:

$$\sum_{j=1}^{100} a_{ij} \neq 0.$$

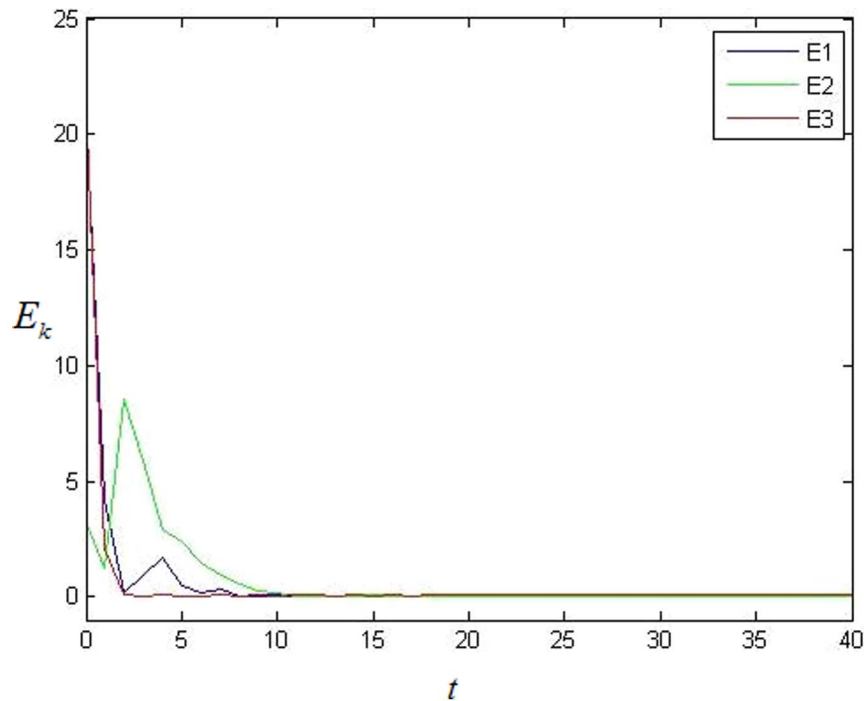

**Figure 1. The average value of error system in BA scale-free network without 0 in-degree nodes.**

doi:10.1371/journal.pone.0095505.g001

The attractor of Lorenz system is bounded by  $|x_{i1}| \leq 29$ ,  $|x_{i2}| \leq 29$ ,  $-1 \leq x_{i3} \leq 57$ ,  $|s_1| \leq 29$ ,  $|s_2| \leq 29$ ,  $-1 \leq s_3 \leq 57$ , thus the network has three clusters. In the following simulation, this paper will use the method in section 3 to confirm the number of clusters is three. According to theorem 1, the dynamic network Eq. (2) with controller Eq. (4) can achieve cluster synchronization when

Eq. (7) is established. In order to measure the quality of the process of cluster synchronization, this paper uses the following quantities:

$$E_k(t) = \sqrt{\sum_{i=k} \|x_i(t) - s_k(t)\|^2}; \quad i = 1, 2, \dots, N; \quad k = 1, 2, 3.$$

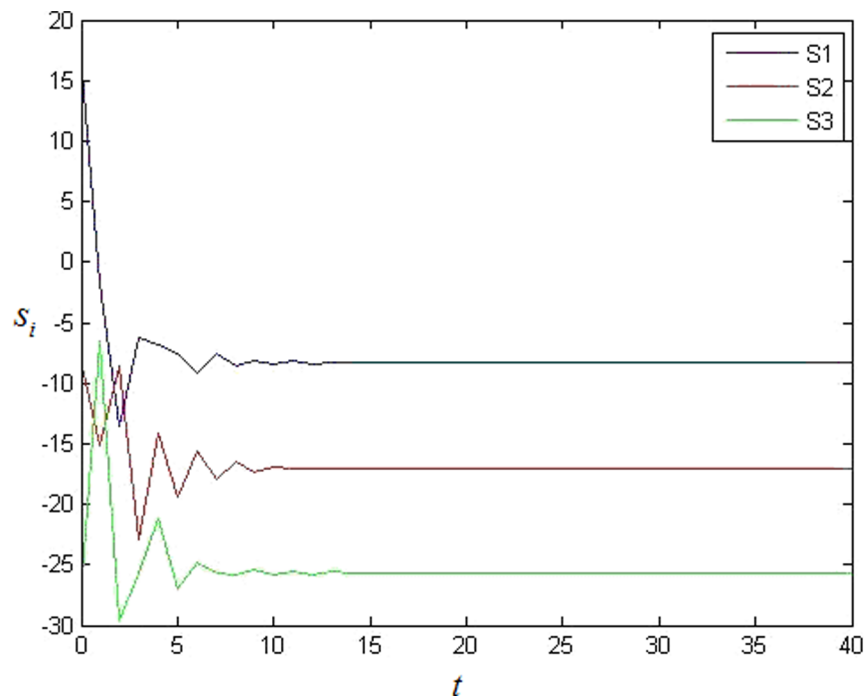

**Figure 2. The value of each cluster's stable state in BA scale-free network without 0 in-degree nodes.**

doi:10.1371/journal.pone.0095505.g002

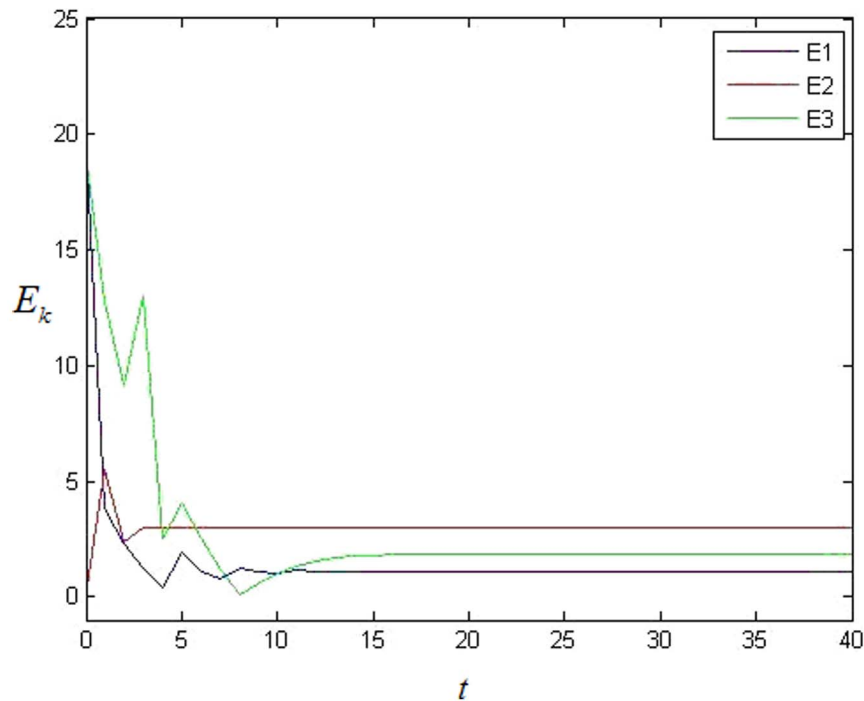

**Figure 3. The average value of error system without adaptive feedback in NW small-world network with 0 in-degree nodes.**  
doi:10.1371/journal.pone.0095505.g003

Here  $E_k(t)$  represents the average of each error system. When the network achieves cluster synchronization, the following equation will be satisfied:

$$\lim_{t \rightarrow \infty} E_k(t) = 0; \quad k = 1, 2, 3.$$

The simulation result is shown in the following. It's easy to see that each error system is 0 at last which means that each cluster achieves synchronization from Fig. 1. Fig. 2 shows the value of  $s_k(t)$ . Because  $s_1 \neq s_2 \neq s_3$  when  $E_1 = E_2 = E_3 = 0$ , it is shown that the nodes in different cluster cannot achieve synchronization

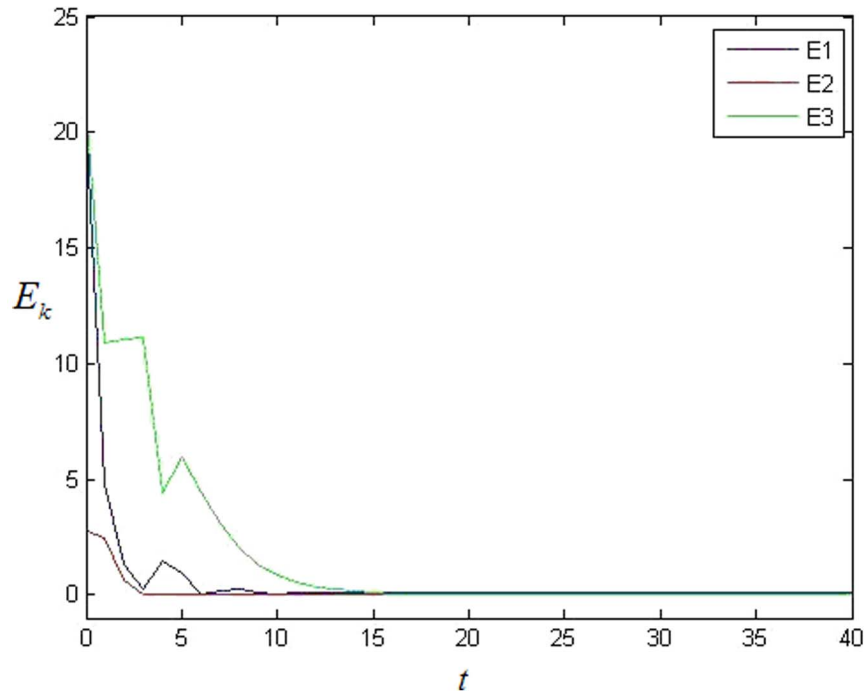

**Figure 4. The average value of error system with adaptive feedback in NW small-world network with 0 in-degree nodes.**  
doi:10.1371/journal.pone.0095505.g004

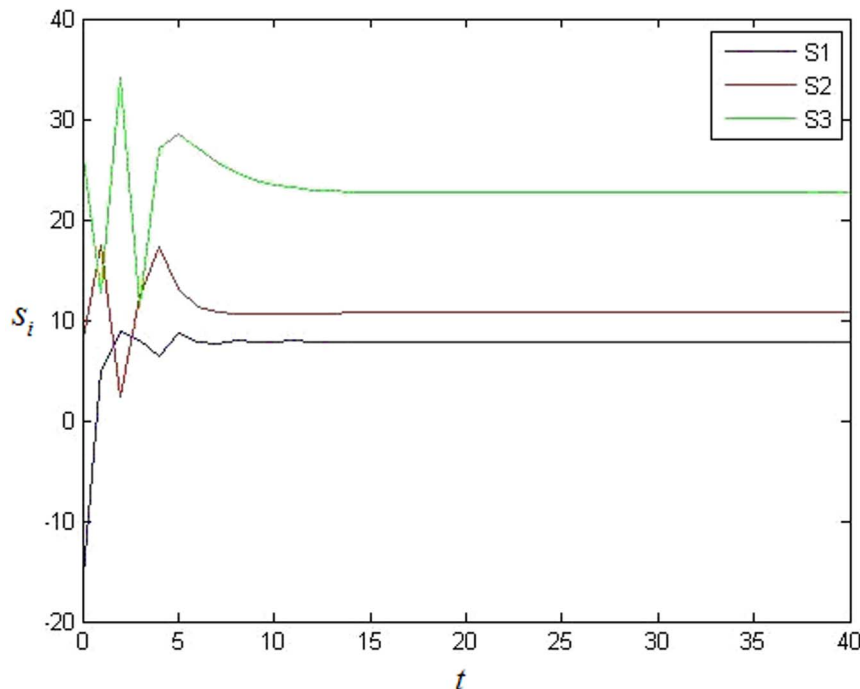

**Figure 5. The value of each cluster's stable state with adaptive feedback in NW small-world network with 0 in-degree nodes.**  
doi:10.1371/journal.pone.0095505.g005

clearly. The network has three clusters according to the simulation result.

### Example 2

In this example, this paper uses a directed WS small-world network. The number of nodes as the BA scale-free in example 1. In detail, this paper will use the parameter to construct a WS small-world network as [4], the rewiring probability is  $p=0.2$ , the number of nodes is 100, and  $k=5$ . In this example, there are some nodes will be chosen randomly as 0-in-degree nodes.

At first, controller Eq. (4) is added on each node. The simulation result is shown as Fig. 3. It is easy to see that each cluster can't achieve synchronization at all because each error system cannot achieve 0. Then the adaptive feedback strategy Eq. (10) is added on each 0-in-degree node, here. The simulation result shows that the network can achieve cluster synchronization as Fig. 4 and Fig. 5. It is easy to see that the network can achieve cluster synchronization when the adaptive feedback strategy as Eq. (10) is used. It is easy to see that the number of clusters is three in Fig. 5.

### Conclusion

In this paper, cluster synchronization of directed complex dynamic network with time delays was investigated. An adaptive

controller is added on each node and feedback strategy is added on 0-in-degree nodes. When the cluster synchronization is achieved, the community of the network also can be recognized. The numerical simulation has demonstrated the effectiveness of the proposed approach. First, a BA scale-free network without 0-in-degree node was investigated. The number of the clusters is unknown. After adding an adaptive controller in theorem 1 on each node, the network can achieve cluster synchronization, and the community of the network also can be recognized correctly. Then, a WS small-world network with some 0-in-degree nodes was investigated. The simulation result showed that only adding the controller in theorem 1 cannot make network achieved cluster synchronization. But if using the adaptive feedback controller in theorem 2, the network can achieve cluster synchronization, and the community of the network can be recognized.

### Author Contributions

Conceived and designed the experiments: LH. Performed the experiments: LH WX. Analyzed the data: LH TG. Contributed reagents/materials/analysis tools: LH. Wrote the paper: LH.

### References

1. Strogatz SH (2001) Exploring complex networks. *Nature* 410(6825): 268–276.
2. Albert R, Barabási A (2002) Statistical mechanics of complex networks. *Reviews of Modern Physics* 74(1): 47–97.
3. Boccaletti S, Latora V, Moreno Y, Chavez W, Hwang DU (2006) Complex networks: structure and dynamics. *Phys Rep* 424: 175–308.
4. Barabási A, Albert R (1999) Emergence of scaling in random networks. *Science* 286(5439): 509–512.
5. Watts DJ, Strogatz SH (1998) Collective dynamics of small-world. *Nature* 393(6684): 440–442.
6. Lu W, Chen T (2004) Synchronization analysis of linearly coupled networks of discrete time systems. *Physica D* 198(1–2): 148–168.
7. Liu H, Chen J, Lu JA (2010) Generalized synchronization in complex dynamical networks via adaptive couplings. *Physica A* 389(8): 1759–1770.
8. Shi BX, Lu JA, Lv JH, Yu XH (2010) Adaptive and impulsive cluster synchronization of a general complex dynamical network. *IEEE ICNSC*: 704–709.
9. Lu XB, Qin BZ (2009) Adaptive cluster synchronization in complex dynamical networks. *Physics Letters A* 373(40): 3650–3658.
10. Liu XW, Chen TP (2011) Cluster synchronization in directed networks via intermittent pinning control. *IEEE Neural Networks* 22(7): 1009–1020.
11. Ma Q, Lu JW (2013) Cluster synchronization for directed complex dynamical networks via pinning control. *Neurocomputing* 101: 354–360.

12. Song Q, Cao J (2010) On pinning synchronization of directed and undirected complex dynamical networks. *IEEE Trans Circuits Syst* 157 (3): 672–680.
13. Nian FZ, Wang XY (2011) Optimal pinning synchronization on directed complex network. *Chaos* 21(4): 043131.
14. Wang XF, Chen GR (2003) Complex networks: small-world, scale-free, and beyond. *IEEE Circuits Syst* 3(1): 6–20.
15. Felipe L, Turci R, Macau EEN (2012) Adaptive node-to-node pinning synchronization control of complex networks. *Chaos* 22: 033151.
16. Wang XF, Chen GR (2012) Synchronization in scale-free dynamical networks: robustness and fragility. *IEEE Circuits Syst* 149 (1): 54–62.
17. Lv JH, Leung H (2005) Synchronization: a fundamental phenomenon in complex dynamical networks. *IEEE Circuits Syst, ISCAS* (1): 300–303.
18. Li X, Chen GR (2003) Synchronization and desynchronization of complex dynamical networks: an engineering viewpoint. *IEEE Circuits Syst I*, 50 (11): 1381–1390.
19. Wang XF, Chen GR (2002) Synchronization in small-world dynamical networks. *Chaos* 12(1): 187–192.
20. Matisziw TC, Grubestic TH, Guo JY (2012) Robustness Elasticity in Complex Networks. *PLOS ONE*: 0039788.
21. Su H, Rong Z, Wang X, Chen G (2010) On decentralized adaptive pinning synchronization of complex dynamical networks. *IEEE Int Symp Circuits Syst*: 417–420.
22. Portillo G, Gleiser PM (2009) An Adaptive Complex Network Model for Brain Functional Networks. *PLOS ONE*: 0006863.
23. Yang Y, Feng G, Ren JZ (2009) A combined backstepping and small-gain approach to robust adaptive fuzzy output feedback control. *IEEE Transactions on Fuzzy Systems* 17(5): 1059–1069.
24. Li YM, Tong SC, Li TS (2012) Adaptive fuzzy output feedback control of MIMO nonlinear uncertain systems with time-varying delays and unknown backlash-like hysteresis. *Neurocomputing* 93: 56–66.
25. Li YM, Tong SC (2011) Adaptive fuzzy backstepping output feedback control of nonlinear uncertain systems with unknown virtual control coefficients using MT-filters. *Neurocomputing* 74(10): 1557–1563.
26. Ma ZJ, Liu ZR, Zhang G (2006) A new method to realize cluster synchronization in connected chaotic networks. *Chaos* 16(2): 1–9.
27. Wu XJ, Lu HT (2011) Cluster synchronization in the adaptive complex dynamical networks via a novel approach. *Physics Letters A* 375(14): 1559–1565.
28. Wang YL, Cao JD (2013) Cluster synchronization in nonlinearly coupled delayed networks of non-identical dynamic systems. *Nonlinear Analysis: Real World Applications* 14(1): 842–851.
29. Chen LP, Chai Y, Wu RC, Ma TD (2012) Cluster synchronization in fractional-order complex dynamical networks. *Physics Letters A* 376(35): 2381–2388.
30. Yang ML, Liu YG, You ZS (2010) Global synchronization for directed complex networks. *Nonlinear Analysis: Real World Applications* 11(3): 2127–2135.
31. Che YQ, Li RX, Han CX, Cui SG, Wang J (2013) Topology identification of uncertain nonlinearly coupled complex networks with delays based on anticipatory synchronization. *Chaos* 23: 013127.
